# Supplementary material for: A Novel Nanoporous Adsorbent for Pesticides Obtained from Biogenic Calcium Carbonate Derived from Waste Crab Shells
Source: MDPI journal article supplement (doi:10.3390/nano13233042), 2023-11-28
Supplement: s1 [file s1]

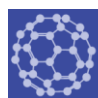

# A novel nanoporous adsorbent for pesticides obtained from biogenic calcium carbonate, derived from waste crab shells

Fran Nekvapil <sup>1,2</sup>, Adina Stegarescu <sup>2</sup>, Ildiko Lung <sup>2</sup>, Razvan Hirian <sup>1</sup>, Dragoş Cosma <sup>2</sup>, Erika Levei <sup>3</sup>, Maria-Loredana Soran <sup>1,2,\*</sup>

<sup>1</sup> Ioan Ursu Institute, Babeş-Bolyai University, 1 Kogălniceanu, 400084 Cluj-Napoca, Romania; fran.nekvapil@ubbcluj.ro (F.N.); razvan.hirian@ubbcluj.ro (R.H.)

<sup>2</sup> National Institute for Research and Development of Isotopic and Molecular Technologies, 67-103 Donat, 400293 Cluj-Napoca, Romania; adina.stegarescu@itim-cj.ro (A.S.); ildiko.lung@itim-cj.ro (I.L.); loredana.soran@itim-cj.ro (M-L. S.)

<sup>3</sup> INCDO-INOE 2000, Research Institute for Analytical Instrumentation, 67 Donat, 400296 Cluj-Napoca, Romania; Erika.levei@icia.ro (E.L.)

\* Correspondence: Loredana.soran@itim-cj.ro; Tel.: (optional; include country code; if there are multiple corresponding authors, add author initials)

## Supplementary material

### Contents:

Figure S1

Figure S2

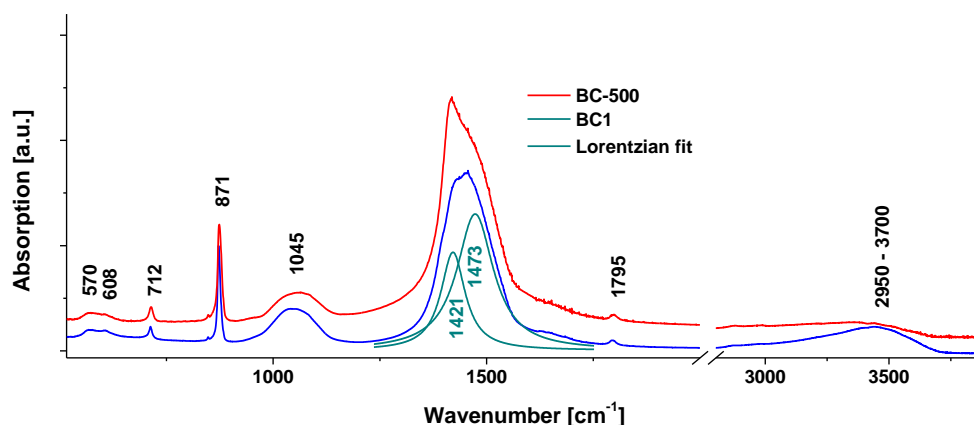

**Figure S1.** Comparative display of the FTIR spectra of adsorbent BC1 (heated in argon flow at 700 °C) and a batch of the same powder stock treated in air at 800 °C. The purpose of this figure is to highlight the signal of CaO and CaOH phases in air treated material, via the additional band at 3640 cm<sup>-1</sup> arising from calcium hydroxide O-H stretching mode, and the red shift of the  $\nu_3$  to a 1423 cm<sup>-1</sup> band relative to calcite-amorphous CaCO<sub>3</sub> mixture of BC1 which exhibits band envelope maximum at 1451 cm<sup>-1</sup> characteristic to calcium oxide.

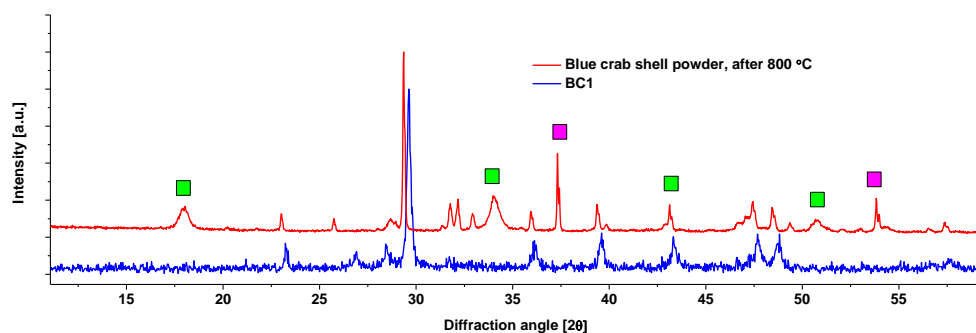

**Figure S2.** Comparative display of the XRD patterns of adsorbent BC1 (heated in argon flow at 700 °C) and a batch of the same powder stock treated in air at 800 °C. The purpose of this figure is to highlight the reflection peaks of CaO and CaOH phases in air treated material: CaO peaks are labelled with magenta squares, CaOH peaks are labelled with green squares.

31  
32  
33  
34  
35  
36  
37
